# Supplementary material for: Role of the stratospheric chemistry–climate interactions in the hot climate conditions of the Eocene
Source: Copernicus journal article supplement (doi:10.5194/cp-15-1187-2019), 2019-07-02
Supplement: Supplementary file 1 [file cp-15-1187-2019-supplement.pdf]

Supplement of *Clim. Past*, 15, 1187–1203, 2019  
<https://doi.org/10.5194/cp-15-1187-2019-supplement>  
© Author(s) 2019. This work is distributed under  
the Creative Commons Attribution 4.0 License.

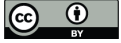

*Supplement of*

## **Role of the stratospheric chemistry–climate interactions in the hot climate conditions of the Eocene**

**Sophie Szopa et al.**

*Correspondence to:* Sophie Szopa ([sophie.szopa@lsce.ipsl.fr](mailto:sophie.szopa@lsce.ipsl.fr))

The copyright of individual parts of the supplement might differ from the CC BY 4.0 License.

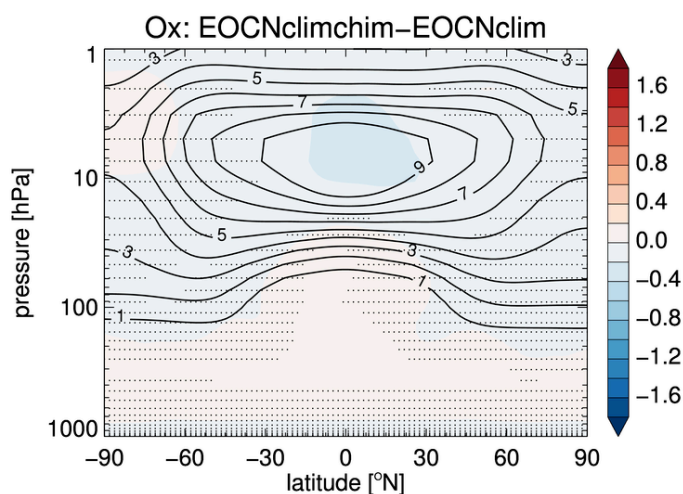

**Figure S1:** Annual mean differences (EOCENE experiment (EOCNclimchim) with  $N_2O$  and  $CH_4$  changed minus EOCENE experiment (EOCNclim) with  $N_2O$  and  $CH_4$  at preindustrial levels in the chemistry model) of zonally averaged ozone (in vmr). Color filled contours indicate that anomalies are statistically different at the 1% confidence level according to a t-test. Black contours show the EOCNclimchim climatology expressed in vmr.

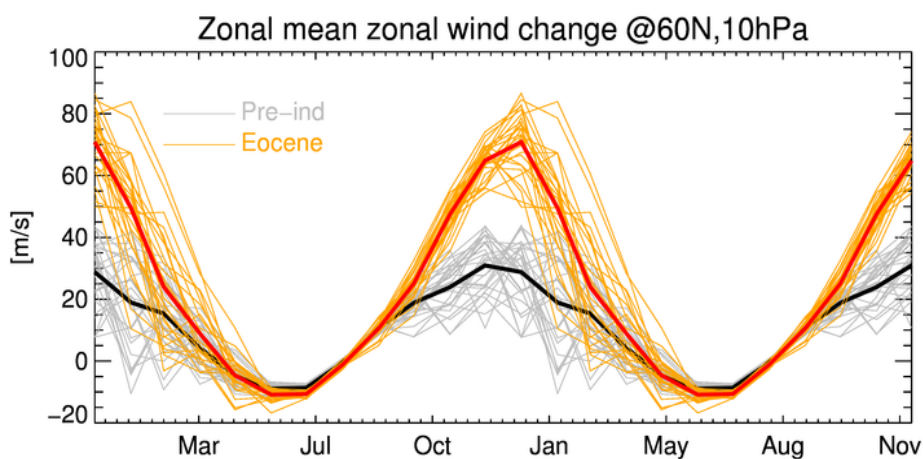

**Figure S2:** Time series of the monthly mean zonal-mean zonal wind at  $60^\circ N$  and 10 hPa ( $\sim 31$  km) for the Eocene and preindustrial simulations. Red and black curves show the climatological averages for the Eocene and Preindustrial simulations, respectively. All simulated years are individually plotted in thin yellow (EOCENE) and grey (PREIND). Note that each year is repeated twice to visualize better the seasonal cycle.
